# Supplementary material for: Teenage-Onset Colorectal Cancers in a Digenic Cancer Predisposition Syndrome Provide Clues for the Interaction between Mismatch Repair and Polymerase δ Proofreading Deficiency in Tumorigenesis
Source: MDPI journal article supplement (doi:10.3390/biom12101350), 2022-09-22
Supplement: s1 [file s1]

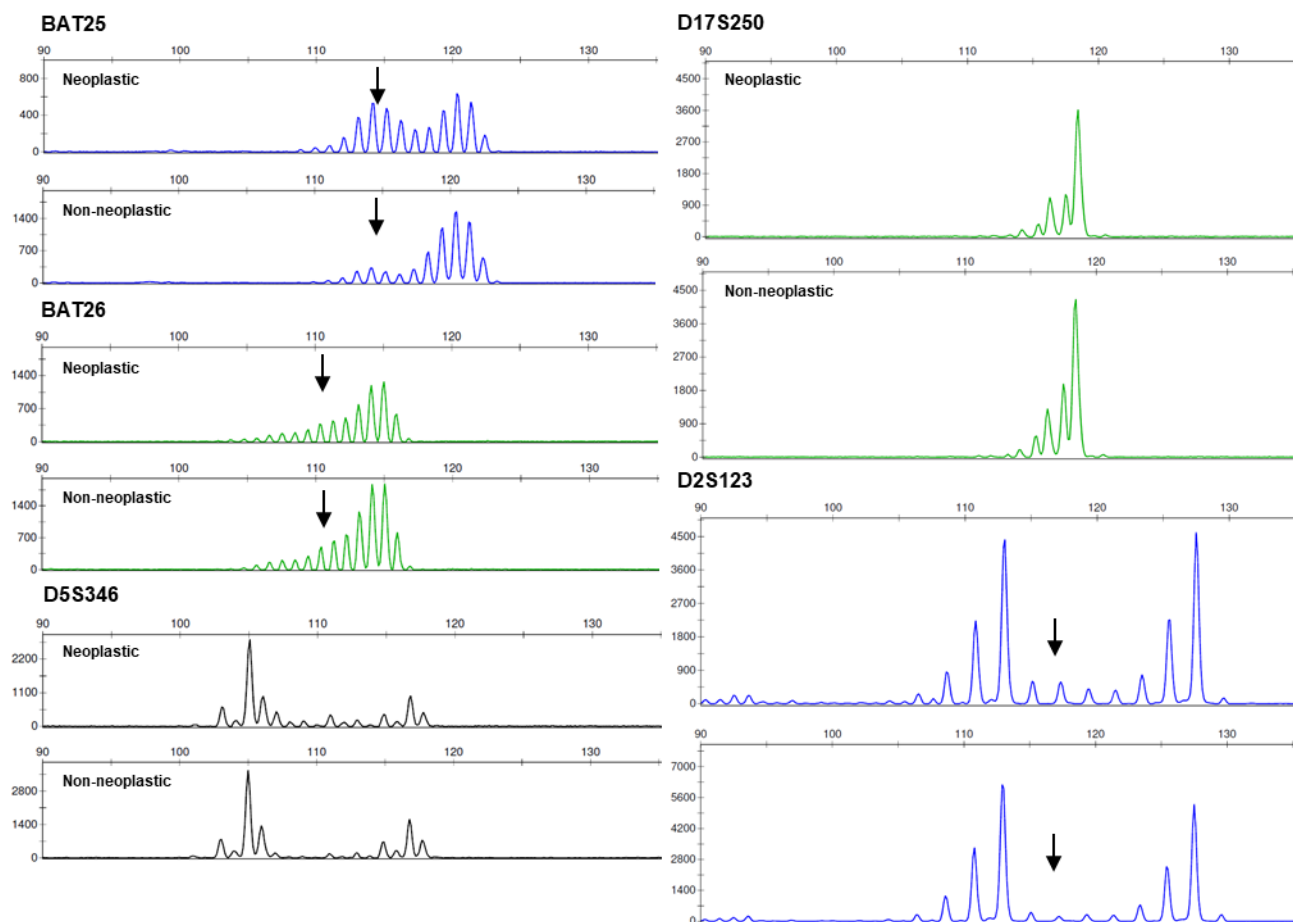

**Supplementary Figure S1.** Microsatellite instability (MSI) analysis of the patient's neoplastic and non-neoplastic cells, both exhibiting PMS2 expression loss. Analysis of 5 MSI markers (BAT25, BAT26, D5S346, D2S123 and D17S250) indicates MSI in three markers (BAT25, BAT26 and D2S123) in both the neoplastic and non-neoplastic cells of the patient's tumor. Additional alleles are highlighted by black arrows.
